# Supplementary material for: The effect of age and speed on foot and ankle kinematics assessed using a 4-segment foot model
Source: PubMed Central journal article supplement (PMC5585503; doi:10.1097/md.0000000000007907), 2017-09-01
Supplement: medi-96-e7907-s001.pdf [file medi-96-e7907-s001.pdf]

academisch ziekenhuis  
Maastricht

P. Debyelaan 25  
postbus 5800  
6202 AZ Maastricht

telefoon 043-387 65 43  
telefax 043-387 78 78

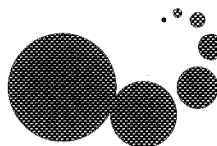

academisch ziekenhuis  
Maastricht

**azM**

Dr. M. Poeze  
Algemene Heelkunde

afdeling **Medisch Ethische Commissie azM/UM**  
uw kenmerk  
ons kenmerk MEC 10-3-072.10/ivb  
doorkiesnummer 043-387 6009  
datum 06 December 2010  
secretariaat.mec@mumc.nl  
[www.azm.nl/info/azMorganisatie/MEC](http://www.azm.nl/info/azMorganisatie/MEC)

**Betreft: Positief besluit NL34131.068.10 / MEC 10-3-072**  
**Titel: Functional outcome Assessment after Calcaneal Trauma Surgery (FACTS Study)**  
**Verrichter: academisch ziekenhuis Maastricht**  
**Hoofdonderzoeker: Dr. M. Poeze**  
**Studiecoördinator cq. indiener: Dr. M. Poeze**

---

Geachte dr. Poeze,

Bijgaand treft u het positief besluit van de Medisch Ethische Commissie azM/UM over bovengenoemd onderzoek aan, zoals dat vandaag verstuurd is aan de geadresseerden.

U kunt pas starten met dit onderzoek, nadat u een goedkeuringsbesluit heeft ontvangen van de Raad van Bestuur van het Maastricht UMC+.

U dient voor 06-12-2011 (1 jaar na dagtekening van het besluit) een voortgangsrapportage over de uitvoering van het onderzoek aan de commissie aan te leveren.

Met vriendelijke groet, namens de Medisch Ethische Commissie azM/UM,

mevr. A.M. Hilton, secretaris

Kopie: CCMO (*digitaal*)  
Clinical Trial Center Maastricht  
Dhr. P. Weijers, per mail [p.weijers@student.maastrichtuniversity.nl](mailto:p.weijers@student.maastrichtuniversity.nl)

Bijlage: Positief besluit NL34131.068.10 / MEC 10-3-072

## BESLUIT

### Primaire beoordeling

|                  |                                                                            |          |          |
|------------------|----------------------------------------------------------------------------|----------|----------|
| NL nummer:       | NL34131.068.10                                                             | METC nr. | 10-3-072 |
| Titel onderzoek: | Functional outcome Assessment after Calcaneal Trauma Surgery (FACTS Study) |          |          |

Contactgegevens: Dr. M. Poeze, Algemene Heelkunde  
Verrichter: academisch ziekenhuis Maastricht, Maastricht

---

### Besluit

De medisch-ethische toetsingscommissie Medisch Ethische Commissie (MEC) azM/UM heeft zich, op grond van artikel 2, tweede lid, sub a van de *Wet medisch-wetenschappelijk onderzoek met mensen* (WMO), beraden over bovenstaand onderzoeksdossier.

De commissie oordeelt positief over de uitvoering van het onderzoek in het volgende centrum:

- Maastricht UMC+, dr. M. Poeze.

### Documenten

Haar oordeel baseert de MEC azM/UM op de documenten, waarover zij bij de beoordeling de beschikking heeft gehad. Een overzicht van de documenten is opgenomen in bijlage 1 bij dit besluit.

### Achtergrond

Op 30-09-2010 is het onderzoeksdossier ter beoordeling bij de MEC azM/UM ingediend. Het onderhavige onderzoeksdossier is besproken in de plenaire vergaderingen van 13-10-2010 en 10-11-2010. Een overzicht van de aanwezige leden bij de vergadering van 10-11-2010 vindt u in bijlage 2. Het onderhavige onderzoeksdossier is voorts behandeld door het dagelijks bestuur in haar vergadering van 01-12-2010.

### Overwegingen

De MEC azM/UM overweegt allereerst dat aan alle in artikel 3 van de WMO genoemde voorwaarden is voldaan. De belangrijkste vragen ten aanzien van het dossier betroffen:

- Inconsistenties en onduidelijkheden ten aanzien van de vraagstelling, opzet, powerberekening en eindpunten van het onderzoek;
- de werving van de proefpersonen.

De onderzoeker heeft het onderzoeksdossier grondig herzien teneinde de bovengenoemde onduidelijkheden op te helderen en de inconsistenties te corrigeren.

De commissie heeft naar aanleiding van de tweede plenaire bespreking aanvullende vragen gesteld met betrekking tot de opzet, in- en exclusiecriteria, powerberekening, eindpunten, werving en overige documenten.

Deze aanvullende vragen zijn, na aanwijzingen en suggesties van de commissie, naar behoren toegelicht.

### **Verzekeringen**

De MEC azM/UM heeft voorts vastgesteld dat op correcte wijze uitvoering is gegeven aan de verzekeringsplicht tot het afsluiten van een proefpersonenverzekering als neergelegd in artikel 7, eerste lid, van de WMO, zoals nader uitgewerkt in het *Besluit verplichte verzekering bij medisch-wetenschappelijk onderzoek met mensen* (Besluit van 23 juni 2003, Stb. 2003, 266).

Het onderzoek valt onder de proefpersonenverzekering van het academisch ziekenhuis Maastricht.

De commissie heeft verder vastgesteld dat is voorzien in de dekking van een aansprakelijkheidsverzekering als bedoeld in artikel 7, zesde lid, van de WMO.

De MEC azM/UM wijst u nog op de voorwaarden en verplichtingen die in acht moeten worden genomen bij de uitvoering van het onderzoek. Een overzicht is opgenomen in bijlage 3 bij dit besluit.

Hoogachtend,  
namens de Medisch Ethische Commissie azM/UM,



Mevr. dr. E.P.M. van Raak, vice-voorzitter

*Maastricht, 06-12-2010*

### **Beroepsprocedure**

Tegen dit besluit kan een belanghebbende op grond van artikel 23 van de WMO binnen zes weken na de dag waarop het besluit is bekend gemaakt, administratief beroep instellen bij de Centrale Commissie Mensgebonden Onderzoek (CCMO). Het beroepschrift dient geadresseerd te worden aan CCMO, Postbus 16302, 2500 BH Den Haag.

## Bijlage 1

### Documenten

- A1. aanbiedingsbrief d.d. 27-09-2010;
- A1. correspondentie: vraagbrief MEC d.d. 27-10-2010 met briefnummer MEC 10-3-072.3, antwoordbrief indiener d.d. 04-11-2010, vraagbrief MEC d.d. 18-11-2010 met briefnummer MEC 10-3-072.6, antwoordbrief indiener d.d. 18-11-2010, e-mail METC d.d. 02-12-2010, aangepaste documenten d.d. 06-12-2010;
- B1. het ABR-formulier versie 04, d.d. 29-11-2010;
- C1. het onderzoeksprotocol versie 4, d.d. 02-12-2010;
- D2. productinformatie VICON Motion Systems: Oxford Foot Model, aangeboden per brief d.d. 27-09-2010;
- E1/2. schriftelijke informatie voor patiënten en voor gezonde proefpersonen, inclusief bijbehorende toestemmingsverklaringen versie 4 d.d. 02-12-2010;
- E3. wervingsmateriaal: flyers voor patiënten en gezonde proefpersonen, aangeleverd bij brief d.d. 18-11-2010;
- E3. wervingsbrief, versie 1 d.d. 03-12-2010;
- F1. vragenlijsten: VAS SCORE, FADI Score, SF-36, RAND-36 aangeboden per brief d.d. 27-09-2010 en 18-11-2010;
- G1. WMO-proefpersonenverzekering van het academisch ziekenhuis Maastricht: certificaat met polisnummer L100050 van verzekeringsmaatschappij Marketform/Lloyd's London d.d. 15-07-2010;
- G2. bewijs dekking aansprakelijkheid van het academisch ziekenhuis Maastricht: certificaat met polisnummer P10/11.001 van Stichting MEBAZ (via herverzekeraar Marketform/Lloyd's London) d.d. 30-09-2010;
- H1. het CV van de onafhankelijke arts drs. P.H. Breedveld;
- I3. het CV van de hoofdonderzoeker in het MUMC+ dr. M. Poeze.

## Bijlage 2

### Samenstelling Medisch Ethische Commissie azM/UM

De volgende leden waren aanwezig tijdens de commissievergadering van 10-11-2010:

- Mw. dr. J.J.M.H. Strik                      psychiater (*lid DB*)
- Dr. G.L. Beets                                chirurg
- Dr. A.W.D. Gavilanes                      kinderarts - *plv. lid*
- Dr. L.M.L. Stolk                              ziekenhuisapotheker/ klinisch  
farmacoloog (*lid DB*)
- Mw. dr. E.P.M. van Raak                    methodoloog/arts-epidemioloog (*vice-  
voorzitter*)
- Mw. dr. C. Widdershoven-  
Heerding                                      ethicus/ filosoof (*lid DB*)
- Mw. mr. R. Talma                            (gezondheids)jurist
- Mw. drs. J.M. barones van  
Voorst tot Voorst- Bloys van  
Treslong                                      proefpersonenlid
- Dr. J. Plat                                      universitair docent voedingskunde
- Dr. P.J.M. Portegijs                        universitair docent huisartsgeneeskunde

### Bijlage 3

#### Voorwaarden en verplichtingen\*

- **geldigheid oordeel:**  
het positieve oordeel verliest zijn geldigheid als met het uitvoeren van het onderzoek niet is begonnen binnen een jaar nadat dit besluit is genomen;
- **amendementen:**  
amendementen dienen ter beoordeling aan de MEC azM/UM te worden voorgelegd;
- **startdatum onderzoek:**  
de MEC azM/UM dient op de hoogte te worden gesteld van de definitieve startdatum van het onderzoek. Dat is de datum waarop de inclusie van de eerste proefpersoon heeft plaatsgevonden;
- **voortgangsrapportage:**  
één jaar na datum oordeel, en ieder jaar daaropvolgend, dient de MEC azM/UM op de hoogte te worden gebracht van de voortgang van het onderzoek middels het formulier 'Voortgangsrapportage';
- **geldigheid verzekering:**  
in het geval één van de verzekeringscertificaten tijdens de looptijd van het onderzoek zijn geldigheid verliest, dient aan de MEC azM/UM tijdig een afschrift van een nieuw geldig certificaat te worden toegestuurd (dit geldt niet voor onderzoek waarbij de verzekering door het azM dan wel Maastricht University afgesloten is);
- **melding artikel 10:**  
indien het onderzoek een verloop neemt dat in noemenswaardige mate voor de proefpersoon ongunstiger is dan in het onderzoeksdossier is voorzien, moet daarvan terstond mededeling worden gedaan aan de MEC azM/UM met een verzoek tot een nader oordeel;
- **melding SAE's:**  
SAE's dienen aan de MEC azM/UM gemeld te worden, bij investigator-initiated onderzoek via ToetsingOnline, bij overig onderzoek via een SAE-meldformulier;
- **melding (voortijdige) beëindiging:**  
(voortijdige) beëindiging van het onderzoek dient, met redenen omkleed, te worden gemeld aan de MEC azM/UM middels het formulier '(voortijdige) beëindiging';
- **eindrapportage:**  
de MEC azM/UM dient op de hoogte te worden gebracht van de resultaten van het onderzoek middels een eindrapport.

\* Termijnen en overige uitleg ten aanzien van de indiening van de verschillende documenten aan de METC vindt u op de website van de CCMO bij het standaard onderzoeksdossier en de toelichting daarop en onder stap 4 van het Stappenplan toetsing toetsingscommissie (TC). Specifieke informatie betreffende de MEC azM/UM kunt u vinden op de website van de MEC azM/UM.
